# Supplementary material for: A Human Corneal Epithelial Cell Line Model for Limbal Stem Cell Biology and Limbal Immunobiology
Source: PubMed Central journal article supplement (PMC5442771; doi:10.5966/sctm.2016-0175), 2016-10-14
Supplement: SCT3-6-0761-s001.pdf [file SCT3-6-0761-s001.pdf]

Supplemental Figure

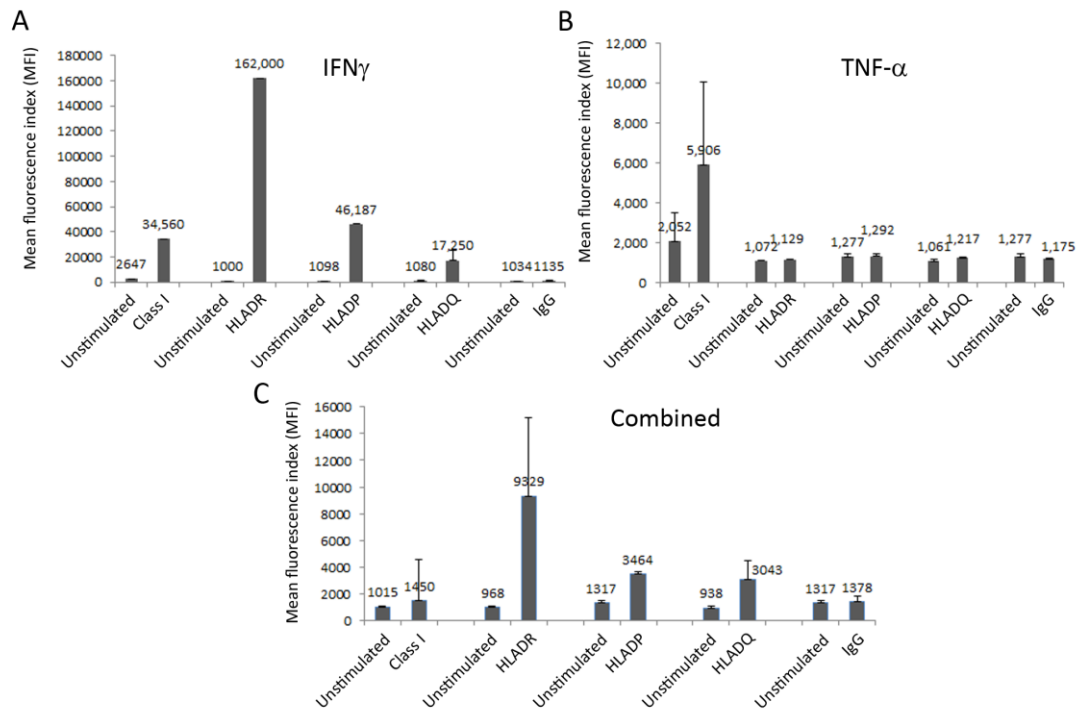

**Figure S1.** Median Fluorescence Index of HLA Class I-A,B,C and Class II expression in HTCEC for control (unstimulated) and stimulated populations under cytokines treatment at 10 ng/ml for 3 days (N=3). Treatment by (A) Interferon- $\gamma$  alone (B) Tumour necrosis- $\alpha$  alone (C) combined treatment. Results are from two biological replicates.

## Supplemental Tables

**Table S1.** Antibodies used in flow cytometry and ICC.

| Antibody                                                  | Dilution | Supplier                                 |
|-----------------------------------------------------------|----------|------------------------------------------|
| <b>PRIMARY</b>                                            |          |                                          |
| Mouse monoclonal FITC anti-human HLA-DR (Clone L243)      | 1:20     | Biologend                                |
| Mouse monoclonal FITC anti-human HLA-A,B,C (Clone W 6/32) | 1:20     | Biologend                                |
| Mouse FITC anti-human HLA-DQ (Clone HLADQ1)               | 1:20     | Biologend                                |
| Mouse monoclonal Anti-human HLA-DP (Clone HI43)           | 1:20     | Abd Serotec                              |
| Mouse monoclonal anti-human CXCR4 (clone 44716.111)       | 1:100    | R & D Systems                            |
| Mouse monoclonal anti-human ABCB5 (clone 5H3C6)           | 1:100    | Abcam                                    |
| Rabbit polyclonal anti-human ABCG2                        | 1:100    | Novus Biologicals                        |
| Mouse monoclonal anti-human NANOG (NNG-811)               | 1:100    | Abcam                                    |
| <b>SECONDARY</b>                                          |          |                                          |
| Goat anti-mouse FITC-conjugated IgG                       | 1:25     | Jackson Immunology Research Laboratories |
| Goat anti-rabbit FITC-conjugated IgG                      | 1:25     | Jackson Immunology Research Laboratories |

**Table S2.** Oligonucleotides primers and amplification conditions.

| Gene                            | Primers            | Sequences                                                | Product Length (bp) | Amplification Cycles | Annealing temperature °C |
|---------------------------------|--------------------|----------------------------------------------------------|---------------------|----------------------|--------------------------|
| <b>LIMBAL STEM CELL MARKERS</b> |                    |                                                          |                     |                      |                          |
| p63                             | Forward<br>Reverse | GTGATGATGGTTCACGTTGG<br>ACATGACGTCGGGTGTTTT              | 143                 | 35                   | 55                       |
| CK3                             | Forward<br>Reverse | GGATGTGGACAGTGCCTATATG<br>AGATAGCTCAGCGTCGTAGAG          | 145                 | 35                   | 53                       |
| ABCG2                           | Forward<br>Reverse | GCGTGCTGTGCCCACTCAAA<br>AGCATGTGCACGGTGCGTTC             | 143                 | 35                   | 55                       |
| C/EBPδ                          | Forward<br>Reverse | ACTCAGCAACGACCCATACC<br>CGCTCCTATGTCCAAGAAA              | 111                 | 35                   | 55                       |
| Connexin 43                     | Forward<br>Reverse | ATGAGCAGTCTGCCTTTCGT<br>TCTGCTTCAAGTGCATGTCC             | 249                 | 35                   | 53.4                     |
| Bmi-1                           | Forward<br>Reverse | CTGGAGAAGGAATGGTCCAC<br>GCCTTGCTACTCCCAGAGTC             | 132                 | 35                   | 51.7                     |
| ABCB5*<br>Hs 02889060_m1        |                    | N/A                                                      | 98                  | 35                   | 55                       |
| <b>GAPDH</b>                    | Forward<br>Reverse | ATG GGG AAG GTG AAG GTC G<br>TAA AAG CAG CCC TGG TGA CC  | 100                 | 35                   | 55                       |
| <b>STEM CELL ANTIGENS</b>       |                    |                                                          |                     |                      |                          |
| Sox2                            | Forward<br>Reverse | AAC CCC AAG ATG CAC AAC TC<br>GCT TAG CCT CGT CGA TGA AC | 100                 | 35                   | 54                       |
| Oct 4                           | Forward<br>Reverse | AGT GAG AGG CAA CCT GGA GA<br>ACA CTC GGA CCA CAT CCT TC | 110                 | 30                   | 54                       |
| NANOG                           | Forward<br>Reverse | TTC CTT CCT CCA TGG ATC TG<br>TCT GCT GGA GGC TGA GGT AT | 213                 | 35                   | 53.1                     |

\*Taqman probe [Applied Biosystems].

**Table S3.** Statistics for image quantification analysis (signal intensities) of CXCR4 and ABCB5 expression in limbal SP and NSP in HTCEC.

|              | N   | Mean signal<br>intensity | ± SD | *P value |
|--------------|-----|--------------------------|------|----------|
| <b>CXCR4</b> |     |                          |      |          |
| - SP         | 46  | 18.16                    | 7.21 | 0.00     |
| - NSP        | 40  | 8.90                     | 3.48 |          |
| <b>ABCB5</b> |     |                          |      |          |
| - SP         | 160 | 26.34                    | 8.70 | 0.02     |
| - NSP        | 160 | 24.16                    | 8.07 |          |

\*Independent t-test.
